# Supplementary material for: Durable superhydrophobic ZnO–SiO2films: a new approach to enhance the abrasion resistant property of trimethylsilyl functionalized SiO2nanoparticles on glass
Source: Royal Society of Chemistry journal article supplement (doi:10.1039/c4ra10171e), 2014-10-17
Supplement: c4ra10171e1.pdf [file c4ra10171e1.pdf]

Electronic Supplementary Information (ESI)

## Durable superhydrophobic ZnO–SiO<sub>2</sub> films: A new approach to enhance the abrasion resistant property of trimethylsilyl functionalized SiO<sub>2</sub> nanoparticles on glass†

5 Indranee Das,<sup>a</sup> Manish Kr Mishra,<sup>a</sup> Samar K Medda<sup>a</sup> and Goutam De<sup>\*a</sup>

<sup>a</sup>Nano-Structured Materials Division, CSIR-Central Glass and Ceramic Research Institute, Kolkata 700032, India

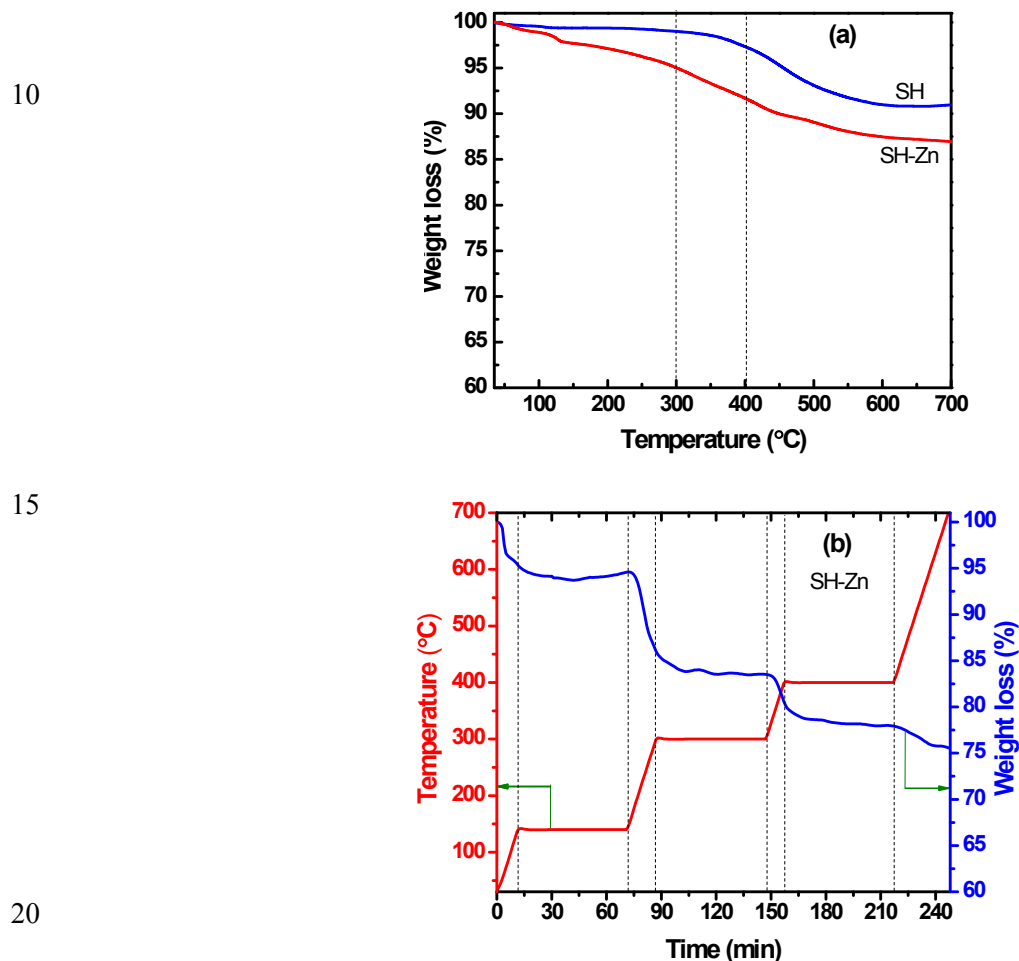

**Fig. S1** TGA of SH-Zn and SH powders. The dynamic TGA of SH-Zn and SH powders previously heated at 100 °C (a). The TGA of as-prepared SH-Zn powder with 1 h isothermal at 140, 300 and 400 °C (b). Both measurements were performed at heating rate of 10 °C min<sup>-1</sup> in pure nitrogen.

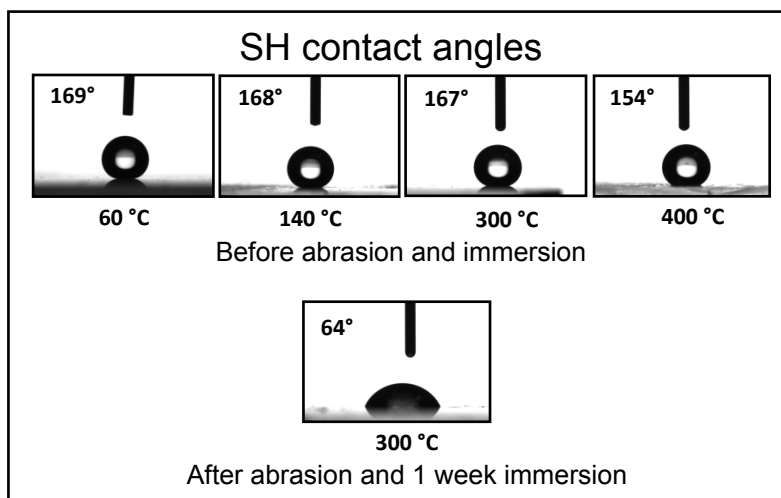

5

**Fig. S2** Contact angle images of water drops (volume 6  $\mu$ l) on SH coatings heated at 60, 140, 300 and 400 °C before and after abrasion and immersion.

10

**Table S1.** Increasing trend of transparency of SH-Zn coatings on glass with systematic heat treatment from 60 to 400 °C under nitrogen atmosphere.

15

| Sample (SH-Zn) heated at different temperature (°C) | Average % T in the range 400-800 nm |
|-----------------------------------------------------|-------------------------------------|
| 60                                                  | 63.0                                |
| 140                                                 | 77.5                                |
| 300                                                 | 81.0                                |
| 400                                                 | 86.0                                |
